# Supplementary material
Source: PubMed Central journal article supplement (PMC7666430)

## Supplemental Online Content

Sud M, Han L, Koh M, et al. Association between adherence to fractional flow reserve treatment thresholds and major adverse cardiac events in patients with coronary artery disease. *JAMA*. doi:10.1001/jama.2020.22708

**eTable 1.** Baseline Characteristics Before Propensity Score Weighting

**eTable 2.** Association Between Percutaneous Coronary Intervention and the Incidence of Non-fatal Outcomes After Propensity Score Weighting

**eTable 3.** Outcomes of Patients Presenting With Ischemic Fractional Flow Reserve ( $\leq 0.80$ ) and Without Myocardial Infarction After Propensity Score Weighting

**eTable 4.** Outcomes of Patients Presenting With Non-ischemic Fractional Flow Reserve ( $> 0.80$ ) and Without Myocardial Infarction After Propensity Score Weighting

**eTable 5.** Outcomes of Patients Presenting With Ischemic and Non-ischemic Fractional Flow Reserve With a Multi-level Propensity Score Accounting for Hospital Site

**eTable 6.** Outcomes of Patients Presenting With Ischemic and Non-ischemic Fractional Flow Reserve After Multiple Imputation for Missing Serum Creatinine and Left Ventricular Ejection Fraction

**eTable 7.** Outcomes of Patients Presenting With Ischemic and Non-ischemic Fractional Flow Reserve After Excluding Coronary Artery Bypass Grafting After Index Procedure

**eTable 8.** Outcomes in Patients Presenting With Ischemic and Non-ischemic Fractional Flow Reserve Stratified by the Number of Diseased Coronary Artery Disease Vessels

**eFigure 1.** Distribution of Fractional Flow Reserve Measurements

**eFigure 2.** Standardized Differences Before and After Propensity Weighting in Patients With Ischemic FFR

**eFigure 3.** Standardized Differences Before and After Propensity Weighting in Patients With Non-ischemic FFR

This supplemental material has been provided by the authors to give readers additional information about their work.

**eTable 1.** Baseline Characteristics Before Propensity Score Weighting

| Baseline Characteristics               | Ischemic Fractional Flow Reserve ( $\leq 0.80$ ) |                 |                            | Non-ischemic Fractional Flow Reserve ( $> 0.80$ ) |                 |                            |
|----------------------------------------|--------------------------------------------------|-----------------|----------------------------|---------------------------------------------------|-----------------|----------------------------|
|                                        | No PCI<br>n=664                                  | PCI<br>n=2,029  | Standardized<br>Difference | No PCI<br>n=5,603                                 | PCI<br>n=810    | Standardized<br>Difference |
| <b>Demographics</b>                    |                                                  |                 |                            |                                                   |                 |                            |
| Age, yrs, mean (SD)                    | 66.0 $\pm$ 10.7                                  | 64.4 $\pm$ 10.6 | 0.146                      | 66.1 $\pm$ 10.7                                   | 65.0 $\pm$ 10.3 | 0.100                      |
| Male, n (%)                            | 478 (72.0%)                                      | 1,488 (73.3%)   | 0.030                      | 3,372 (60.2%)                                     | 547 (67.5%)     | 0.153                      |
| Female, n (%)                          | 186 (28.0%)                                      | 541 (26.7%)     | 0.030                      | 2,231 (39.8%)                                     | 263 (32.5%)     | 0.153                      |
| <b>Index Presentation</b>              |                                                  |                 |                            |                                                   |                 |                            |
| Stable Coronary Artery Disease         | 439 (66.1%)                                      | 1,268 (62.5%)   | 0.076                      | 3,625 (64.7%)                                     | 448 (55.3%)     | 0.193                      |
| Unstable Angina                        | 104 (15.7%)                                      | 477 (23.5%)     | 0.199                      | 1,220 (21.8%)                                     | 204 (25.2%)     | 0.081                      |
| Non-ST Elevation Myocardial Infarction | 109 (16.4%)                                      | 265 (13.1%)     | 0.095                      | 714 (12.7%)                                       | 151 (18.6%)     | 0.163                      |
| <b>Pre-existing Comorbidities</b>      |                                                  |                 |                            |                                                   |                 |                            |
| Myocardial Infarction                  | 268 (40.4%)                                      | 816 (40.2%)     | 0.003                      | 1,959 (35.0%)                                     | 334 (41.2%)     | 0.129                      |
| Percutaneous Coronary Intervention     | 182 (27.4%)                                      | 743 (36.6%)     | 0.198                      | 1,916 (34.2%)                                     | 282 (34.8%)     | 0.013                      |
| Heart Failure                          | 136 (20.5%)                                      | 219 (10.8%)     | 0.269                      | 655 (11.7%)                                       | 76 (9.4%)       | 0.075                      |
| Diabetes                               | 299 (45.0%)                                      | 750 (37.0%)     | 0.165                      | 1,994 (35.6%)                                     | 296 (36.5%)     | 0.020                      |
| Cerebrovascular Disease                | 56 (8.4%)                                        | 167 (8.2%)      | 0.007                      | 412 (7.4%)                                        | 62 (7.7%)       | 0.011                      |
| Peripheral Vascular Disease            | 52 (7.8%)                                        | 113 (5.6%)      | 0.091                      | 315 (5.6%)                                        | 35 (4.3%)       | 0.060                      |
| Hypertension                           | 539 (81.2%)                                      | 1,613 (79.5%)   | 0.042                      | 4,419 (78.9%)                                     | 634 (78.3%)     | 0.015                      |
| Hyperlipidemia                         | 508 (76.5%)                                      | 1,539 (75.9%)   | 0.015                      | 4,241 (75.7%)                                     | 559 (69.0%)     | 0.150                      |
| Renal Disease                          | 34 (5.1%)                                        | 38 (1.9%)       | 0.177                      | 166 (3.0%)                                        | 23 (2.8%)       | 0.007                      |
| Dialysis                               | 22 (3.3%)                                        | 30 (1.5%)       | 0.120                      | 114 (2.0%)                                        | 12 (1.5%)       | 0.042                      |
| Chronic Obstructive Pulmonary Disease  | 91 (13.7%)                                       | 217 (10.7%)     | 0.092                      | 630 (11.2%)                                       | 76 (9.4%)       | 0.061                      |
| <b>Smoking</b>                         |                                                  |                 |                            |                                                   |                 |                            |
| Current                                | 121 (18.2%)                                      | 433 (21.3%)     | 0.078                      | 883 (15.8%)                                       | 140 (17.3%)     | 0.041                      |

|                                                    |                  |                  |       |                  |                  |        |
|----------------------------------------------------|------------------|------------------|-------|------------------|------------------|--------|
| Former                                             | 196 (29.5%)      | 618 (30.5%)      | 0.021 | 1,767 (31.5%)    | 229 (28.3%)      | 0.071  |
| Charlson Comorbidity Index, mean ± SD              | 1.8 ± 1.9        | 1.5 ± 1.6        | 0.212 | 1.4 ± 1.6        | 1.5 ± 1.5        | 0.036  |
|                                                    |                  |                  |       |                  |                  |        |
| <b>Investigations</b>                              |                  |                  |       |                  |                  |        |
| Serum Creatinine                                   |                  |                  |       |                  |                  |        |
| ≤1.36 mg/dL                                        | 533 (80.3%)      | 1,698 (83.7%)    | 0.089 | 4,708 (84.0%)    | 698 (86.2%)      | 0.060  |
| 1.37 to 2.04 mg/dL                                 | 59 (8.9%)        | 128 (6.3%)       | 0.097 | 316 (5.6%)       | 48 (5.9%)        | 0.012  |
| >2.04 mg/dL                                        | 25 (3.8%)        | 36 (1.8%)        | 0.122 | 134 (2.4%)       | 9 (1.1%)         | 0.098  |
| Missing                                            | 47 (7.1%)        | 167 (8.2%)       | 0.043 | 445 (7.9%)       | 55 (6.8%)        | 0.044  |
| Left Ventricular Ejection Fraction                 |                  |                  |       |                  |                  |        |
| ≥50%                                               | 360 (54.2%)      | 1,000 (49.3%)    | 0.099 | 3,181 (56.8%)    | 383 (47.3%)      | 0.191  |
| 35-49%                                             | 98 (14.8%)       | 194 (9.6%)       | 0.160 | 549 (9.8%)       | 64 (7.9%)        | 0.067  |
| <35%                                               | 49 (7.4%)        | 91 (4.5%)        | 0.040 | 247 (4.4%)       | 31 (3.8%)        | 0.030  |
| Missing                                            | 157 (23.6%)      | 744 (36.6%)      | 0.280 | 1626 (30.0%)     | 332 (41.0%)      | 0.250  |
|                                                    |                  |                  |       |                  |                  |        |
| <b>Symptom Status</b>                              |                  |                  |       |                  |                  |        |
| Canadian Cardiovascular Society Class <sup>a</sup> |                  |                  |       |                  |                  |        |
| 0 (least impaired)                                 | 134 (20.2%)      | 291 (14.3%)      | 0.150 | 869 (15.5%)      | 143 (17.7%)      | 0.060  |
| 1                                                  | 87 (13.1%)       | 286 (14.1%)      | 0.030 | 741 (13.2%)      | 90 (11.1%)       | 0.060  |
| 2                                                  | 166 (25.0%)      | 539 (26.6%)      | 0.040 | 1,531 (27.3%)    | 198 (24.4%)      | 0.070  |
| 3                                                  | 88 (13.3%)       | 372 (18.3%)      | 0.140 | 870 (15.5%)      | 126 (15.6%)      | <0.001 |
| 4 (most impaired)                                  | 189 (28.5%)      | 541 (26.7%)      | 0.060 | 1,592 (28.4%)    | 253 (31.2%)      | 0.120  |
|                                                    |                  |                  |       |                  |                  |        |
| <b>Interventional Characteristics</b>              |                  |                  |       |                  |                  |        |
| Fractional Flow Reserve, mean (SD)                 | 0.75 (0.06)      | 0.74 (0.06)      | 0.150 | 0.89 (0.05)      | 0.87 (0.05)      | 0.400  |
| Fractional Flow Reserve, median (IQR)              | 0.77 (0.73-0.79) | 0.76 (0.72-0.78) | -     | 0.89 (0.85-0.93) | 0.86 (0.83-0.91) | -      |
| Vessels with stenosis ≥70%                         |                  |                  |       |                  |                  |        |
| 0                                                  | 165 (24.8%)      | 514 (25.3%)      | 0.011 | 3,903 (69.7%)    | 307 (37.9%)      | 0.672  |
| 1                                                  | 188 (28.3%)      | 1,040 (51.3%)    | 0.482 | 1,120 (20.0%)    | 353 (43.6%)      | 0.524  |
| 2                                                  | 187 (28.2%)      | 382 (18.8%)      | 0.222 | 433 (7.7%)       | 115 (14.2%)      | 0.208  |
| 3                                                  | 124 (18.7%)      | 93 (4.6%)        | 0.451 | 147 (2.6%)       | 35 (4.3%)        | 0.093  |

| Fractional Flow Reserve Artery |             |               |      |               |             |      |
|--------------------------------|-------------|---------------|------|---------------|-------------|------|
| Left Anterior Descending       | 592 (89.2%) | 1,608 (79.3%) | 0.27 | 3,426 (61.1%) | 520 (64.2%) | 0.06 |
| Right Coronary                 | 45 (6.8%)   | 271 (13.4%)   | 0.22 | 1,210 (21.6%) | 135 (16.7%) | 0.13 |
| Left Circumflex                | 27 (4.1%)   | 150 (7.4%)    | 0.14 | 967 (17.3%)   | 155 (19.1%) | 0.05 |
|                                |             |               |      |               |             |      |

Abbreviations: PCI – percutaneous coronary intervention, SD – standard deviation, IQR – interquartile range

a - the Canadian Cardiovascular Society classification is a score used to grade the severity of angina with 0 indicating least impaired (no angina) and 4 indicating most impaired (angina at rest)

**eTable 2.** Association Between Percutaneous Coronary Intervention and the Incidence of Non-fatal Outcomes After Propensity Score Weighting<sup>a</sup>

| Outcome                                        | Follow-up Time | Ischemic Fractional Flow Reserve<br>(≤ 0.80) | Non-Ischemic Fractional Flow Reserve<br>(> 0.80) |
|------------------------------------------------|----------------|----------------------------------------------|--------------------------------------------------|
|                                                |                | sHR (95% CI) <sup>b</sup>                    | sHR (95% CI)                                     |
| Myocardial Infarction                          | 30 days        | 0.87 (0.44 to 1.72)                          | 3.56 (1.70 to 7.46)                              |
|                                                | 1 year         | 1.17 (0.74 to 1.87)                          | 2.05 (1.26 to 3.32)                              |
|                                                | 5 years        | 0.93 (0.65 to 1.34)                          | 1.70 (1.21 to 2.39)                              |
| Unstable Angina                                | 30 days        | 0.37 (0.18 to 0.74)                          | 3.02 (1.26 to 7.25)                              |
|                                                | 1 year         | 0.68 (0.44 to 1.03)                          | 2.40 (1.63 to 3.53)                              |
|                                                | 5 years        | 0.82 (0.59 to 1.15)                          | 1.80 (1.36 to 2.38)                              |
| Urgent Coronary Revascularization <sup>b</sup> | 30 days        | 0.13 (0.04 to 0.45)                          | 0.97 (0.27 to 3.45)                              |
|                                                | 1 year         | 0.57 (0.33 to 0.97)                          | 2.20 (1.29 to 3.75)                              |
|                                                | 5 years        | 0.72 (0.47 to 1.09)                          | 1.78 (1.22 to 2.60)                              |

Abbreviations: PCI – percutaneous coronary intervention, sHR –sub-distribution hazard ratio (using Fine and Gray regression), CI – confidence interval, RD – Risk Difference

a - The Fine and Gray regression model was used to calculate the sub-distribution hazard ratios of all non-fatal outcomes that treated death a competing risk event. Patients undergoing PCI were compared with no PCI (reference group). Lower sHR indicates better outcomes in favor of the PCI group.

b - urgent coronary revascularization was defined as unplanned hospitalization with percutaneous coronary intervention or coronary artery bypass grafting occurring during the same hospitalization

**eTable 3.** Outcomes of Patients Presenting With Ischemic Fractional Flow Reserve ( $\leq 0.80$ ) and Without Myocardial Infarction After Propensity Score Weighting

| Outcome <sup>a</sup>                                 | Follow-up Time | No PCI (%)<br>Reference | PCI (%) | RD (95% CI) <sup>b</sup> | HR (95% CI) <sup>c</sup> | sHR (95% CI) <sup>d</sup> |
|------------------------------------------------------|----------------|-------------------------|---------|--------------------------|--------------------------|---------------------------|
| <b>Primary Outcome</b>                               |                |                         |         |                          |                          |                           |
| <b>MACE</b>                                          | 30 days        | 5.3%                    | 2.1%    | -3.2% (-5.5% to -1.2%)   | 0.38 (0.22 to 0.65)      | NA <sup>e</sup>           |
|                                                      | 1 year         | 13.7%                   | 10.9%   | -2.8% (-6.3% to 0.7%)    | 0.77 (0.57 to 1.04)      | NA                        |
|                                                      | 5 years        | 34.3%                   | 29.5%   | -4.8% (-12.5% to 2.0%)   | 0.78 (0.62 to 0.99)      | NA                        |
| <b>Secondary Outcomes</b>                            |                |                         |         |                          |                          |                           |
| <b>Death</b>                                         | 30 days        | 0.9%                    | 0.4%    | -0.5% (-1.4% to 0.4%)    | 0.46 (0.14 to 1.56)      | NA                        |
|                                                      | 1 year         | 3.3%                    | 3.2%    | -0.1% (-1.9% to 1.6%)    | 0.97 (0.56 to 1.68)      | NA                        |
|                                                      | 5 years        | 17.8%                   | 14.8%   | -3.0% (-10.2% to 3.0%)   | 0.78 (0.53 to 1.14)      | NA                        |
| <b>Myocardial Infarction</b>                         | 30 days        | 1.0%                    | 0.6%    | -0.4% (-1.4% to 0.5%)    | 0.62 (0.20 to 1.91)      | 0.63 (0.20 to 1.92)       |
|                                                      | 1 year         | 2.2%                    | 2.8%    | 0.6% (-0.9% to 1.9%)     | 1.26 (0.68 to 2.34)      | 1.27 (0.68 to 2.35)       |
|                                                      | 5 years        | 8.0%                    | 7.5%    | -0.5% (-4.9% to 3.2%)    | 0.93 (0.60 to 1.45)      | 0.95 (0.61 to 1.47)       |
| <b>Unstable Angina</b>                               | 30 days        | 2.8%                    | 1.1%    | -1.7% (-3.4% to -0.3%)   | 0.39 (0.19 to 0.81)      | 0.39 (0.19 to 0.82)       |
|                                                      | 1 year         | 7.1%                    | 5.1%    | -2.0% (-4.6% to 0.5%)    | 0.70 (0.46 to 1.08)      | 0.71 (0.46 to 1.09)       |
|                                                      | 5 years        | 12.2%                   | 10.6%   | -1.6% (-5.6% to 2.2%)    | 0.81 (0.57 to 1.14)      | 0.81 (0.58 to 1.15)       |
| <b>Urgent Coronary Revascularization<sup>f</sup></b> | 30 days        | 1.9%                    | 0.2%    | -1.7% (-3.0% to -0.6%)   | 0.11 (0.03 to 0.46)      | 0.11 (0.03 to 0.46)       |
|                                                      | 1 year         | 4.4%                    | 2.2%    | -2.2% (-4.2% to -0.1%)   | 0.50 (0.29 to 0.88)      | 0.50 (0.29 to 0.88)       |
|                                                      | 5 years        | 7.9%                    | 5.9%    | -2.0% (-5.9% to 1.4%)    | 0.70 (0.45 to 1.08)      | 0.70 (0.45 to 1.09)       |

Abbreviations: MACE – major adverse cardiac events, PCI – percutaneous coronary intervention, HR –hazard ratio, sHR – sub-distribution hazard ratio, CI – confidence interval, RD – Risk Difference

a - Death treated as a competing risk for all non-fatal outcomes

b - risk differences were estimated from weighted cumulative incidence curves along with 95% confidence intervals generated in 2,000 bootstrap resamples

c - hazard ratios and 95% confidence intervals were estimated from weighted cause-specific proportional hazards models

d - sub-distribution hazard ratios and 95% confidence intervals were estimated from weighted Fine-Gray regression models

e - sub-distribution hazards were not estimated because outcomes included death as an event

f - urgent coronary revascularization was defined as unplanned hospitalization with percutaneous coronary intervention or coronary artery bypass grafting occurring during the same hospitalization

**eTable 4.** Outcomes of Patients Presenting With Non-ischemic Fractional Flow Reserve (> 0.80) and Without Myocardial Infarction After Propensity Score Weighting

| Outcome <sup>a</sup>                                 | Follow-up Time | No PCI (%)<br>Reference | PCI (%) | RD (95% CI) <sup>b</sup> | HR (95% CI) <sup>c</sup> | sHR (95% CI) <sup>d</sup> |
|------------------------------------------------------|----------------|-------------------------|---------|--------------------------|--------------------------|---------------------------|
| <b>Primary Outcome</b>                               |                |                         |         |                          |                          |                           |
| <b>MACE</b>                                          | 30 days        | 1.0%                    | 2.4%    | 1.4% (0.0% to 3.2%)      | 2.48 (1.23 to 4.98)      | NA <sup>e</sup>           |
|                                                      | 1 year         | 5.5%                    | 9.2%    | 3.7% (1.1% to 6.6%)      | 1.73 (1.24 to 2.40)      | NA                        |
|                                                      | 5 years        | 23.6%                   | 30.2%   | 6.6% (1.1% to 12.8%)     | 1.30 (1.05 to 1.62)      | NA                        |
| <b>Secondary Outcomes</b>                            |                |                         |         |                          |                          |                           |
| <b>Death</b>                                         | 30 days        | 0.3%                    | 0.0%    | -0.3% (-0.5% to -0.1%)   | 0.15 (0.02 to 1.12)      | NA                        |
|                                                      | 1 year         | 1.9%                    | 1.3%    | -0.6% (-1.7% to 0.9%)    | 0.67 (0.27 to 1.68)      | NA                        |
|                                                      | 5 years        | 12.6%                   | 11.3%   | -1.3% (-5.6% to 3.6%)    | 0.81 (0.54 to 1.20)      | NA                        |
| <b>Myocardial Infarction</b>                         | 30 days        | 0.2%                    | 1.6%    | 1.4% (0.2% to 2.9%)      | 7.25 (2.40 to 21.91)     | 7.25 (2.40 to 21.92)      |
|                                                      | 1 year         | 1.1%                    | 2.8%    | 1.7% (0.0% to 3.5%)      | 2.48 (1.28 to 4.80)      | 2.48 (1.28 to 4.81)       |
|                                                      | 5 years        | 4.3%                    | 7.4%    | 3.1% (0.4% to 6.4%)      | 1.83 (1.21 to 2.78)      | 1.85 (1.22 to 2.81)       |
| <b>Unstable Angina</b>                               | 30 days        | 0.4%                    | 1.3%    | 0.9% (-0.2% to 2.3%)     | 2.88 (1.02 to 8.13)      | 2.88 (1.02 to 8.13)       |
|                                                      | 1 year         | 2.5%                    | 5.8%    | 3.3% (1.3% to 5.7%)      | 2.42 (1.59 to 3.68)      | 2.42 (1.59 to 3.69)       |
|                                                      | 5 years        | 8.3%                    | 14.1%   | 5.8% (1.8% to 10.5%)     | 1.76 (1.30 to 2.37)      | 1.78 (1.32 to 2.40)       |
| <b>Urgent Coronary Revascularization<sup>f</sup></b> | 30 days        | 0.2%                    | 0.2%    | 0.0% (-0.3% to 0.3%)     | 0.88 (0.19 to 4.19)      | 0.88 (0.19 to 4.19)       |
|                                                      | 1 year         | 1.0%                    | 2.1%    | 1.1% (0.0% to 2.4%)      | 2.11 (1.14 to 3.92)      | 2.12 (1.14 to 3.93)       |
|                                                      | 5 years        | 4.0%                    | 7.1%    | 3.1% (0.3% to 6.7%)      | 1.67 (1.10 to 2.52)      | 1.69 (1.12 to 2.56)       |

Abbreviations: MACE – major adverse cardiac events, PCI – percutaneous coronary intervention, HR –hazard ratio, sHR – sub-distribution hazard ratio, CI – confidence interval

a - Death treated as a competing risk for all non-fatal outcomes

b - risk differences were estimated from weighted cumulative incidence curves along with 95% confidence intervals generated in 2,000 bootstrap resamples

c - hazard ratios and 95% confidence intervals were estimated from weighted cause-specific proportional hazards models



d - sub-distribution hazard ratios and 95% confidence intervals were estimated from weighted Fine-Gray regression models

e - sub-distribution hazards were not estimated because outcomes included death as an event

f - urgent coronary revascularization was defined as unplanned hospitalization with percutaneous coronary intervention or coronary artery bypass grafting occurring during the same hospitalization

**eTable 5.** Outcomes of Patients Presenting With Ischemic and Non-ischemic Fractional Flow Reserve With a Multi-level Propensity Score Accounting for Hospital Site

| Cohort                                            | Analysis                               | MACE Follow-up Time | No PCI (%)<br>Reference | PCI (%) | RD (95% CI) <sup>a</sup> | HR (95% CI) <sup>b</sup> |
|---------------------------------------------------|----------------------------------------|---------------------|-------------------------|---------|--------------------------|--------------------------|
| Ischemic Fractional Flow Reserve ( $\leq 0.80$ )  | Multi-level analysis for hospital site | 30 days             | 5.7%                    | 2.8%    | -2.9% (-5.4% to -1.1%)   | 0.48 (0.31 to 0.75)      |
|                                                   |                                        | 1 year              | 14.6%                   | 11.8%   | -2.8% (-6.5% to 0.1%)    | 0.79 (0.59 to 1.05)      |
|                                                   |                                        | 5 years             | 37.8%                   | 31.3%   | -6.5% (-15.4% to -0.1%)  | 0.81 (0.65 to 1.00)      |
| Non-ischemic Fractional Flow Reserve ( $> 0.80$ ) | Multi-level analysis for hospital site | 30 days             | 1.5%                    | 3.5%    | 2.0% (0.3% to 3.2%)      | 2.36 (1.37 to 4.05)      |
|                                                   |                                        | 1 year              | 6.5%                    | 10.5%   | 4.0% (1.4% to 6.3%)      | 1.65 (1.22 to 2.21)      |
|                                                   |                                        | 5 years             | 24.3%                   | 31.4%   | 7.1% (2.9% to 14.7%)     | 1.30 (1.06 to 1.60)      |

Abbreviations: MACE – major adverse cardiac events, PCI – percutaneous coronary intervention, HR –hazard ratio, RD – Risk Difference, CI – confidence interval

a - risk differences were estimated from weighted cumulative incidence curves along with 95% confidence intervals generated in 2,000 bootstrap resamples

b - hazard ratios and 95% confidence intervals were estimated from weighted cause-specific proportional hazards models

**eTable 6.** Outcomes of Patients Presenting With Ischemic and Non-ischemic Fractional Flow Reserve After Multiple Imputation for Missing Serum Creatinine and Left Ventricular Ejection Fraction<sup>a</sup>

| Cohort                                            | Analysis                                   | MACE Follow-up Time | HR (95% CI) <sup>b</sup> |
|---------------------------------------------------|--------------------------------------------|---------------------|--------------------------|
| Ischemic Fractional Flow Reserve ( $\leq 0.80$ )  | Multiple Imputation of LVEF and Creatinine | 30 days             | 0.45 (0.29 to 0.72)      |
|                                                   |                                            | 1 year              | 0.73 (0.56 to 0.96)      |
|                                                   |                                            | 5 years             | 0.77 (0.63 to 0.94)      |
| Non-ischemic Fractional Flow Reserve ( $> 0.80$ ) | Multiple Imputation of LVEF and Creatinine | 30 days             | 2.03 (1.22 to 3.37)      |
|                                                   |                                            | 1 year              | 1.71 (1.30 to 2.24)      |
|                                                   |                                            | 5 years             | 1.40 (1.17 to 1.68)      |

Abbreviations: MACE – major adverse cardiac events, PCI – percutaneous coronary intervention, HR –hazard ratio, CI – confidence interval

a – Multiple imputation was used to impute serum creatinine and left ventricular ejection fraction in 30 datasets. The propensity-weighted analysis was conducted in each dataset and the results were pooled.

b - hazard ratios and 95% confidence intervals were estimated from weighted cause-specific proportional hazards models

**eTable 7.** Outcomes of Patients Presenting With Ischemic and Non-ischemic Fractional Flow Reserve After Excluding Coronary Artery Bypass Grafting After Index Procedure

| Cohort                                            | Exclusion                            | MACE Follow-up Time | No PCI (%)<br>Reference | PCI (%) | RD (95% CI) <sup>a</sup> | HR (95% CI) <sup>b</sup> |
|---------------------------------------------------|--------------------------------------|---------------------|-------------------------|---------|--------------------------|--------------------------|
| Ischemic Fractional Flow Reserve ( $\leq 0.80$ )  | CABG within 1 month of FFR Excluded  | 30 days             | 4.4%                    | 3.1%    | -1.3% (-2.9% to 0.4%)    | 0.70 (0.45 to 1.10)      |
|                                                   |                                      | 1 year              | 18.7%                   | 13.3%   | -5.4% (-8.5% to -2.2%)   | 0.68 (0.54 to 0.84)      |
|                                                   |                                      | 5 years             | 37.4%                   | 34.3%   | -3.1% (-8.9% to 3.0%)    | 0.80 (0.68 to 0.95)      |
|                                                   | CABG within 3 months of FFR Excluded | 30 days             | 5.0%                    | 2.9%    | -2.1% (-3.9% to -0.1%)   | 0.59 (0.38 to 0.92)      |
|                                                   |                                      | 1 year              | 16.8%                   | 12.6%   | -4.2% (-7.3% to -0.9%)   | 0.73 (0.57 to 0.93)      |
|                                                   |                                      | 5 years             | 40.0%                   | 33.8%   | -6.2% (-13.6% to 0.6%)   | 0.76 (0.64 to 0.92)      |
| Non-ischemic Fractional Flow Reserve ( $> 0.80$ ) | CABG within 1 month of FFR Excluded  | 30 days             | 1.5%                    | 3.0%    | 1.5% (0.3% to 3.0%)      | 2.02 (1.22 to 3.34)      |
|                                                   |                                      | 1 year              | 6.9%                    | 10.8%   | 3.9% (1.3% to 6.7%)      | 1.61 (1.23 to 2.10)      |
|                                                   |                                      | 5 years             | 27.8%                   | 39.3%   | 11.5% (4.7% to 18.1%)    | 1.36 (1.14 to 1.61)      |
|                                                   | CABG within 3 months of FFR Excluded | 30 days             | 1.5%                    | 3.0%    | 1.5% (0.3% to 3.0%)      | 2.02 (1.22 to 3.36)      |
|                                                   |                                      | 1 year              | 6.7%                    | 10.8%   | 4.1% (1.6% to 6.8%)      | 1.66 (1.27 to 2.17)      |
|                                                   |                                      | 5 years             | 27.7%                   | 39.6%   | 11.9% (5.3% to 18.5%)    | 1.38 (1.16 to 1.64)      |

Abbreviations: MACE – major adverse cardiac events, PCI – percutaneous coronary intervention, HR –hazard ratio, CI – confidence interval, RD – Risk Difference, FFR – Fractional Flow Reserve, CABG – coronary artery bypass grafting

a - risk differences were estimated from weighted cumulative incidence curves along with 95% confidence intervals generated in 2,000 bootstrap resamples

b - hazard ratios and 95% confidence intervals were estimated from weighted cause-specific proportional hazards models

**eTable 8.** Outcomes in Patients Presenting With Ischemic and Non-ischemic Fractional Flow Reserve Stratified by the Number of Diseased Coronary Artery Disease Vessels

| Cohort                                                               | Diseased Vessels with Stenosis $\geq 70\%$ | MACE Follow-up Time | No PCI (%)<br><i>Reference</i> | PCI (%) | RD (95% CI) <sup>a</sup> | HR (95% CI) <sup>b</sup> |
|----------------------------------------------------------------------|--------------------------------------------|---------------------|--------------------------------|---------|--------------------------|--------------------------|
| <b>Ischemic Fractional Flow Reserve (<math>\leq 0.80</math>)</b>     | 0 or 1-vessel                              | 30 days             | 3.8%                           | 2.0%    | -1.8% (-4.4% to 0.4%)    | 0.52 (0.27 to 1.02)      |
|                                                                      |                                            | 1 year              | 10.7%                          | 8.8%    | -1.9% (-5.8% to 1.8%)    | 0.81 (0.55 to 1.19)      |
|                                                                      |                                            | 5 years             | 35.7%                          | 26.8%   | -8.9% (-20.7% to 1.3%)   | 0.78 (0.60 to 1.02)      |
|                                                                      | 2- or 3-vessel                             | 30 days             | 11.4%                          | 5.0%    | -6.4% (-11.6% to -1.7%)  | 0.44 (0.24 to 0.78)      |
|                                                                      |                                            | 1 year              | 24.1%                          | 18.6%   | -5.5% (-12.2% to 1.6%)   | 0.72 (0.51 to 1.02)      |
|                                                                      |                                            | 5 years             | 49.2%                          | 44.2%   | -5.0% (-15.7% to 6.1%)   | 0.80 (0.61 to 1.04)      |
| <b>Non-ischemic Fractional Flow Reserve (<math>&gt; 0.80</math>)</b> | 0 or 1-vessel                              | 30 days             | 0.8%                           | 2.9%    | 2.1% (0.8% to 3.5%)      | 3.56 (2.00 to 6.34)      |
|                                                                      |                                            | 1 year              | 5.0%                           | 9.6%    | 4.6% (2.1% to 7.4%)      | 2.00 (1.46 to 2.74)      |
|                                                                      |                                            | 5 years             | 21.6%                          | 30.2%   | 8.6% (3.5% to 13.8%)     | 1.45 (1.18 to 1.77)      |
|                                                                      | 2- or 3-vessel                             | 30 days             | 6.4%                           | 5.9%    | -0.5% (-5.5% to 3.9%)    | 0.92 (0.36 to 2.33)      |
|                                                                      |                                            | 1 year              | 17.4%                          | 23.8%   | 6.4% (-5.6% to 13.9%)    | 1.40 (0.88 to 2.23)      |
|                                                                      |                                            | 5 years             | 42.9%                          | 38.7%   | -4.2% (-20.6% to 8.1%)   | 1.01 (0.70 to 1.46)      |

Abbreviations: MACE – major adverse cardiac events, PCI – percutaneous coronary intervention, HR –hazard ratio, CI – confidence interval, RD – Risk Difference, FFR – Fractional Flow Reserve

a - risk differences were estimated from weighted cumulative incidence curves along with 95% confidence intervals generated in 2,000 bootstrap resamples

b - hazard ratios and 95% confidence intervals were estimated from weighted cause-specific proportional hazards models

**eFigure 1.** Distribution of Fractional Flow Reserve Measurements. Histograms depict the proportion of patients with fractional flow reserve measurements among **(A)** the entire cohort (median 0.86, IQR: 0.79 – 0.91), **(B)** in patients undergoing PCI (median 0.78, IQR: 0.74 – 0.82) and **(C)** patients who did not have PCI (median 0.88, IQR 0.84 – 0.92).

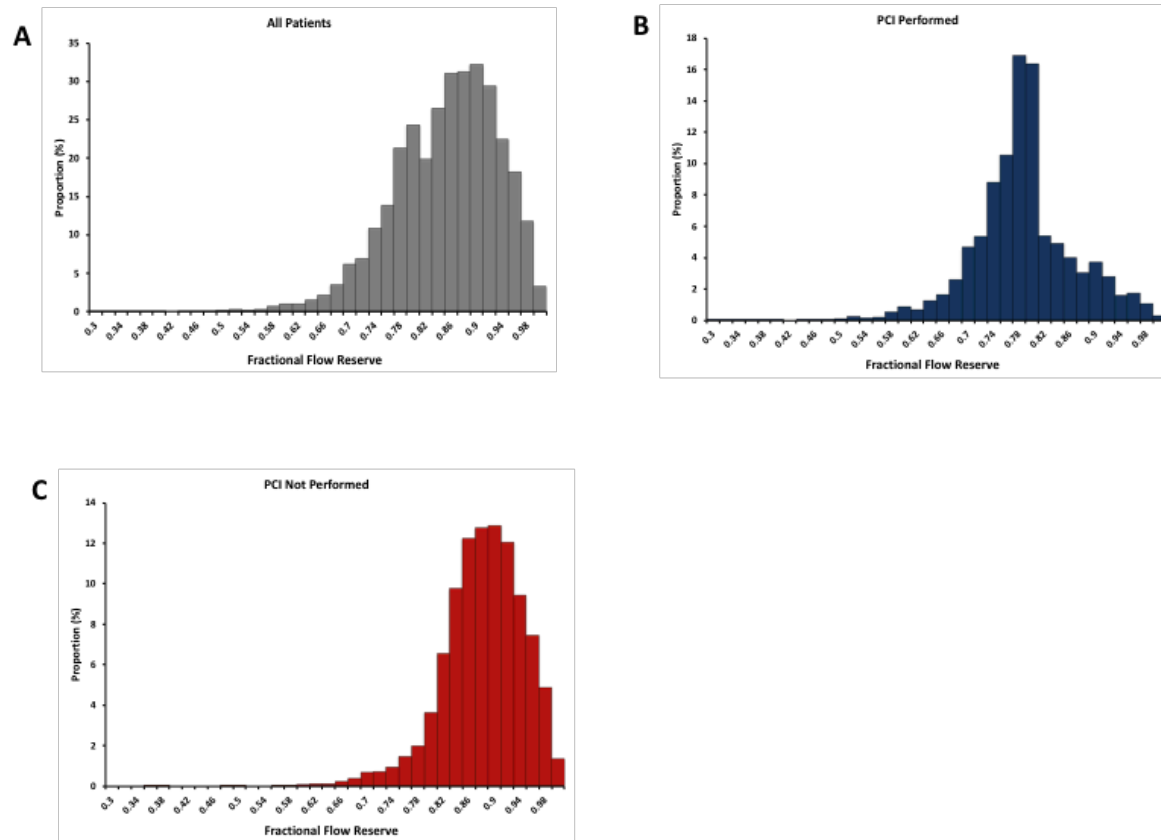

**eFigure 2.** Standardized Differences Before and After Propensity Weighting in Patients With Ischemic FFR. The standardized differences for each confounder before (blue) and after (red) propensity score weighting are depicted in descending order. Ideally, a standardized difference of less than 0.1 is desirable, and indicates good balance.

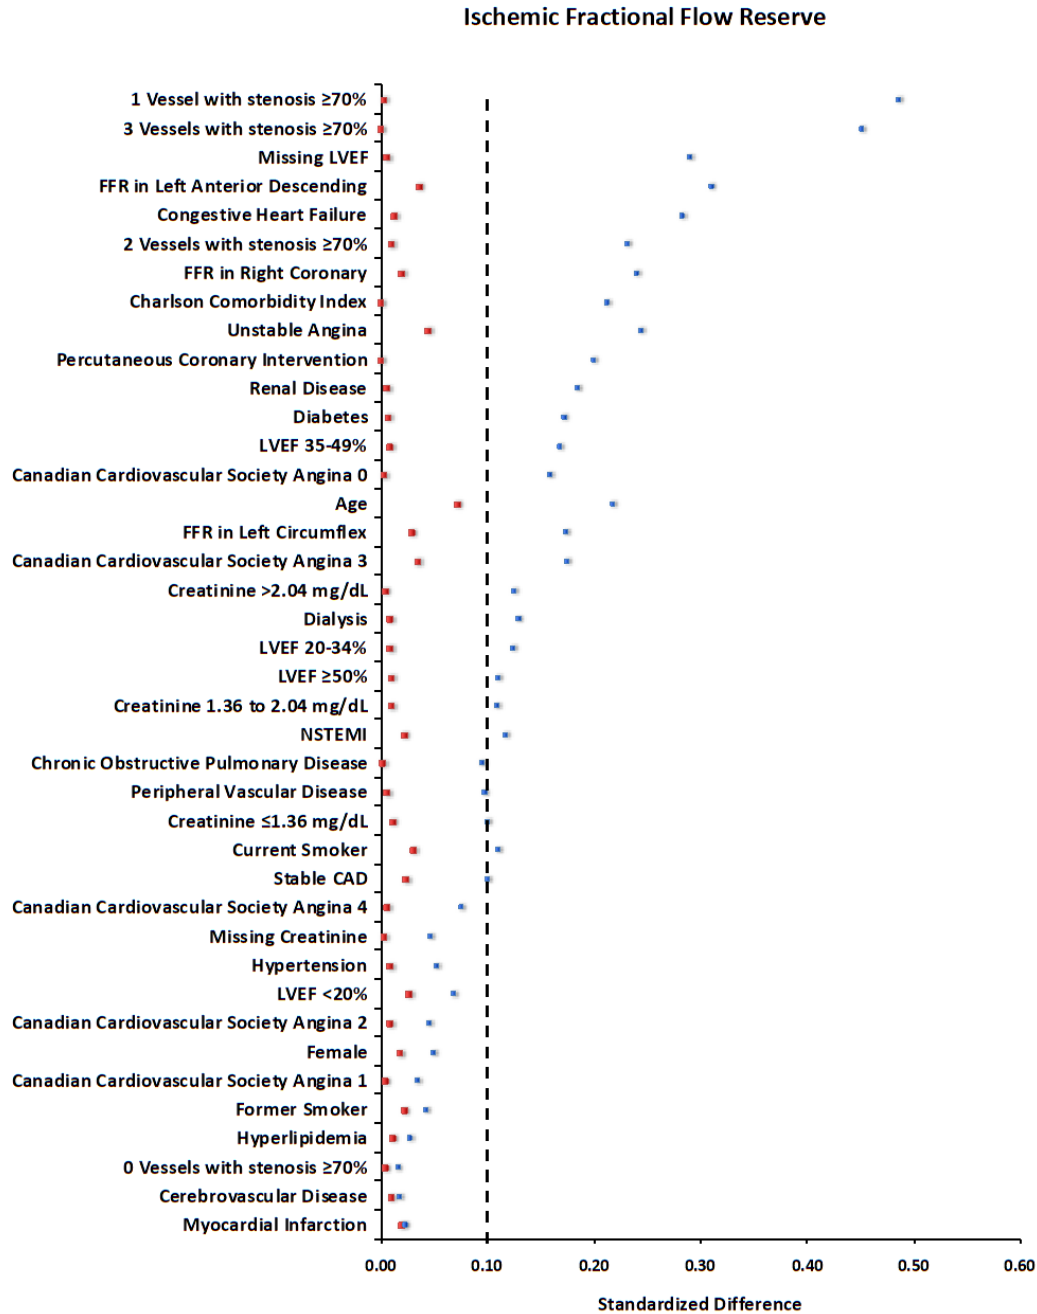

**eFigure 3.** Standardized Differences Before and After Propensity Weighting in Patients With Non-ischemic FFR. The standardized differences for each confounder before (blue) and after (red) propensity score weighting are depicted in descending order. Ideally, a standardized difference of less than 0.1 is desirable, and indicates good balance.

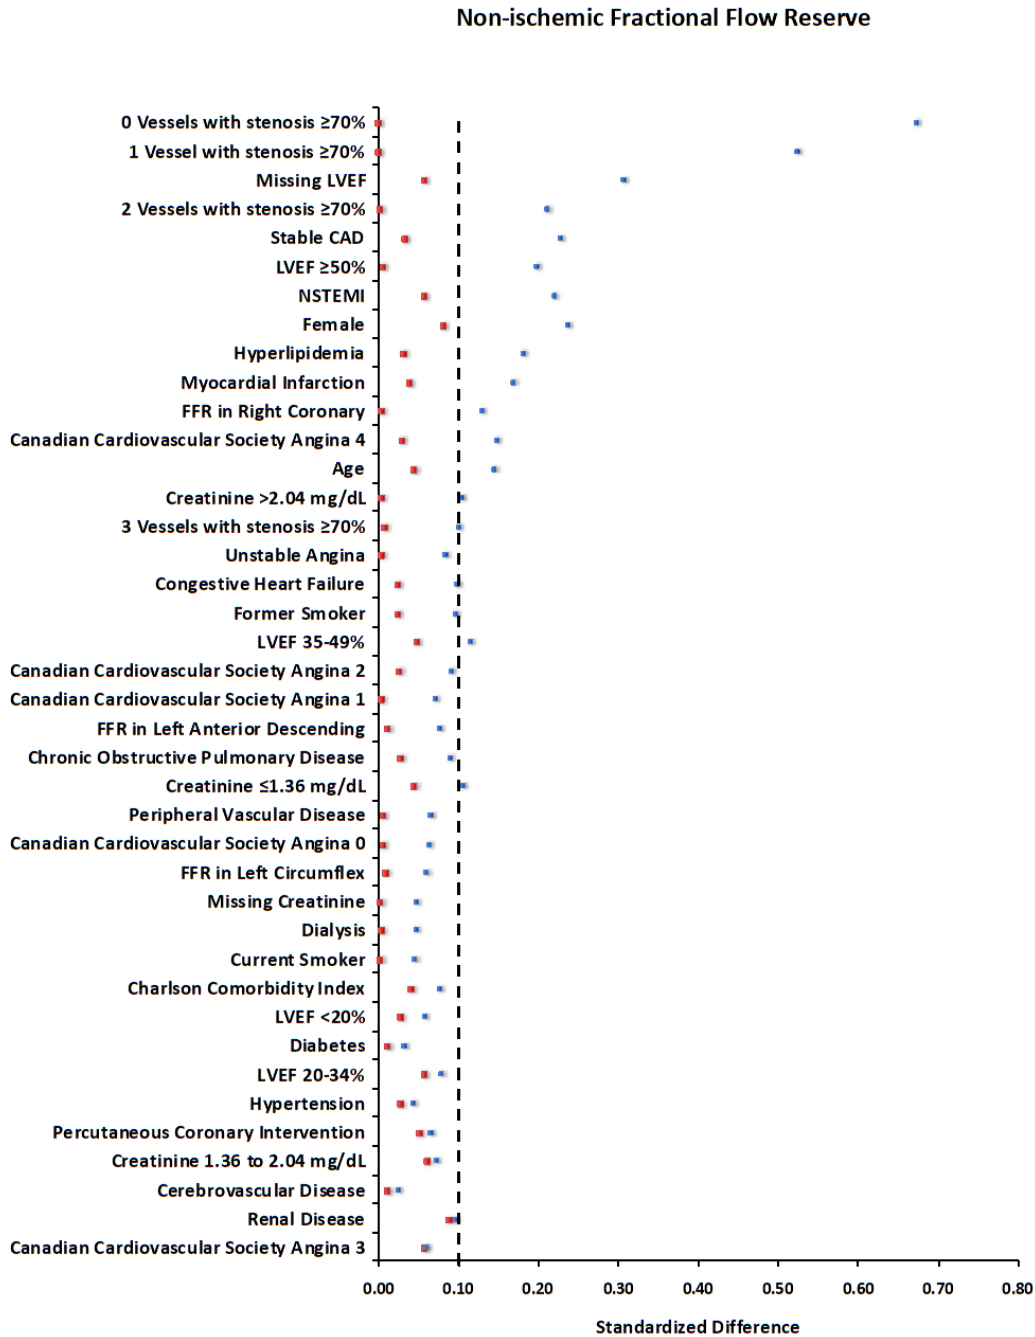

Supplement: jama-e2022708-s001.pdf [file jama-e2022708-s001.pdf]
